# Supplementary material for: High-quality, chromosome-scale genome assemblies: comparisons of three Diaphorina citri (Asian citrus psyllid) geographic populations
Source: PubMed Central journal article supplement — DNA Res. 2022 Jul 22;29(4):dsac027. doi: 10.1093/dnares/dsac027 (PMC9338690; doi:10.1093/dnares/dsac027), 2022-07-22
Supplement: dsac027_supplementary_data.pdf [file dsac027_supplementary_data.pdf]

**Table S1.** Sequence Read Archive accession numbers used to predict piRNA clusters in each respective population.

| <b>SRA Accession #</b> | <b>D. citri population</b> | <b>Source</b> | <b>Publication</b>      |
|------------------------|----------------------------|---------------|-------------------------|
| SRX8463967             | CRF-UY                     | Whole body    | Nigg <i>et al.</i> 2020 |
| SRX8463959             | CRF-TW                     | Whole body    | Nigg et al. 2020        |
| SRX8463965             | CRF-TW                     | Whole body    | Nigg et al. 2020        |
| SRX8463966             | CRF-TW                     | Whole body    | Nigg et al. 2020        |
| SRX8463936             | CRF-CA                     | Whole body    | Nigg et al. 2020        |
| SRX8463937             | CRF-CA                     | Whole body    | Nigg et al. 2020        |
| SRX8463948             | CRF-CA                     | Whole body    | Nigg et al. 2020        |

**Table S2.** Accession numbers used for constructing full mitochondrial coding sequence TCS haplotype network.

| <b>NCBI Accession #</b> | <b>Locality</b>            | <b>Haplotype</b> | <b>Publication Source</b> |
|-------------------------|----------------------------|------------------|---------------------------|
| OM181945.1              | CRF-CA                     |                  | 1 This study              |
| OM181946.1              | CRF-TW                     |                  | 16 This study             |
| OM181947.1              | CRF-UY                     |                  | 17 This study             |
| KY426014                | California, USA            |                  | 1 Wu <i>et al.</i> 2017   |
| KY426015                | Florida, USA               |                  | 1 Wu <i>et al.</i> 2017   |
| MF614803                | Shaoguan, Guangdong, Chi   |                  | 2 Wu <i>et al.</i> 2018   |
| MF614804                | Huizhou, Guangdong, Chin   |                  | 2 Wu <i>et al.</i> 2018   |
| MF614805                | Yangchun, Guangdong, Chi   |                  | 2 Wu <i>et al.</i> 2018   |
| MF614806                | Jieyang, Guangdong, China  |                  | 3 Wu <i>et al.</i> 2018   |
| MF614807                | Xiamen, Fujian, China      |                  | 3 Wu <i>et al.</i> 2018   |
| MF614808                | Fuzhou, Fujian, China      |                  | 4 Wu <i>et al.</i> 2018   |
| MF614809                | Ji'an, Jiangxi, China      |                  | 2 Wu <i>et al.</i> 2018   |
| MF614810                | Guangchang, Jiangxi, China |                  | 2 Wu <i>et al.</i> 2018   |
| MF614811                | Hainan, China              |                  | 2 Wu <i>et al.</i> 2018   |
| MF614812                | Yulin, Guangxi, China      |                  | 5 Wu <i>et al.</i> 2018   |
| MF614813                | Nanning, Guangxi, China    |                  | 6 Wu <i>et al.</i> 2018   |
| MF614814                | Zhejiang, China            |                  | 4 Wu <i>et al.</i> 2018   |
| MF614815                | Yizhang, Hunan, China      |                  | 7 Wu <i>et al.</i> 2018   |
| MF614816                | Miyi, Sichuan, China       |                  | 8 Wu <i>et al.</i> 2018   |
| MF614817                | Ningnan, Sichuan, China    |                  | 9 Wu <i>et al.</i> 2018   |
| MF614818                | Wangmo, Guizhou, China     |                  | 10 Wu <i>et al.</i> 2018  |
| MF614819                | Bingchuan, Yunnan, China   |                  | 9 Wu <i>et al.</i> 2018   |
| MF614820                | Jianshui, Yunnan, China    |                  | 9 Wu <i>et al.</i> 2018   |
| MF614821                | Ruili, Yunnan, China       |                  | 11 Wu <i>et al.</i> 2018  |
| MF614822                | Baoshao, Yunnan, China     |                  | 11 Wu <i>et al.</i> 2018  |
| MF614823                | Taiwan                     |                  | 3 Wu <i>et al.</i> 2018   |
| MF614824                | Cambodia                   |                  | 12 Wu <i>et al.</i> 2018  |
| MF614825                | Malaysia                   |                  | 13 Wu <i>et al.</i> 2018  |
| MF614826                | Vietnam                    |                  | 3 Wu <i>et al.</i> 2018   |
| MF614827                | Indonesia                  |                  | 14 Wu <i>et al.</i> 2018  |
| MF614828                | Pakistan                   |                  | 15 Wu <i>et al.</i> 2018  |

**Table S3.** Accession numbers used for constructing partial mitochondrial CO1 sequence TCS haplotype network.

| <b>NCBI Accession</b> | <b>Locality</b> | <b>Haplotype</b> | <b>Publication Source</b> |
|-----------------------|-----------------|------------------|---------------------------|
| FJ190321.1            | Brazil          | 1                | Boykin et al. 2012        |
| FJ190322.1            | Brazil          | 1                | Boykin et al. 2012        |
| FJ190323.1            | Brazil          | 1                | Boykin et al. 2012        |
| FJ190324.1            | Brazil          | 1                | Boykin et al. 2012        |
| KY426014.1            | California      | 1                | Wu et al. 2017            |
| OM181945.1            | CRF-CA          | 1                | This study                |
| FJ190167.1            | Florida         | 1                | Boykin et al. 2012        |
| FJ190168.1            | Florida         | 1                | Boykin et al. 2012        |
| FJ190169.1            | Florida         | 1                | Boykin et al. 2012        |
| FJ190170.1            | Florida         | 1                | Boykin et al. 2012        |
| FJ190171.1            | Florida         | 1                | Boykin et al. 2012        |
| FJ190172.1            | Florida         | 1                | Boykin et al. 2012        |
| FJ190173.1            | Florida         | 1                | Boykin et al. 2012        |
| FJ190174.1            | Florida         | 1                | Boykin et al. 2012        |
| FJ190175.1            | Florida         | 1                | Boykin et al. 2012        |
| FJ190176.1            | Florida         | 1                | Boykin et al. 2012        |
| FJ190182.1            | Florida         | 1                | Boykin et al. 2012        |
| FJ190183.1            | Florida         | 1                | Boykin et al. 2012        |
| FJ190184.1            | Florida         | 1                | Boykin et al. 2012        |
| FJ190185.1            | Florida         | 1                | Boykin et al. 2012        |
| FJ190186.1            | Florida         | 1                | Boykin et al. 2012        |
| FJ190187.1            | Florida         | 1                | Boykin et al. 2012        |
| FJ190188.1            | Florida         | 1                | Boykin et al. 2012        |
| FJ190189.1            | Florida         | 1                | Boykin et al. 2012        |
| FJ190190.1            | Florida         | 1                | Boykin et al. 2012        |
| FJ190191.1            | Florida         | 1                | Boykin et al. 2012        |
| FJ190192.1            | Florida         | 1                | Boykin et al. 2012        |
| FJ190193.1            | Florida         | 1                | Boykin et al. 2012        |
| FJ190194.1            | Florida         | 1                | Boykin et al. 2012        |
| FJ190195.1            | Florida         | 1                | Boykin et al. 2012        |
| FJ190196.1            | Florida         | 1                | Boykin et al. 2012        |
| FJ190197.1            | Florida         | 1                | Boykin et al. 2012        |
| FJ190198.1            | Florida         | 1                | Boykin et al. 2012        |
| FJ190199.1            | Florida         | 1                | Boykin et al. 2012        |
| FJ190200.1            | Florida         | 1                | Boykin et al. 2012        |
| FJ190201.1            | Florida         | 1                | Boykin et al. 2012        |
| FJ190202.1            | Florida         | 1                | Boykin et al. 2012        |
| FJ190203.1            | Florida         | 1                | Boykin et al. 2012        |
| FJ190204.1            | Florida         | 1                | Boykin et al. 2012        |
| FJ190205.1            | Florida         | 1                | Boykin et al. 2012        |
| FJ190206.1            | Florida         | 1                | Boykin et al. 2012        |
| FJ190207.1            | Florida         | 1                | Boykin et al. 2012        |
| FJ190208.1            | Florida         | 1                | Boykin et al. 2012        |

|            |         |                      |
|------------|---------|----------------------|
| FJ190209.1 | Florida | 1 Boykin et al. 2012 |
| FJ190210.1 | Florida | 1 Boykin et al. 2012 |
| FJ190211.1 | Florida | 1 Boykin et al. 2012 |
| FJ190212.1 | Florida | 1 Boykin et al. 2012 |
| FJ190213.1 | Florida | 1 Boykin et al. 2012 |
| FJ190214.1 | Florida | 1 Boykin et al. 2012 |
| FJ190215.1 | Florida | 1 Boykin et al. 2012 |
| FJ190216.1 | Florida | 1 Boykin et al. 2012 |
| FJ190217.1 | Florida | 1 Boykin et al. 2012 |
| FJ190218.1 | Florida | 1 Boykin et al. 2012 |
| FJ190219.1 | Florida | 1 Boykin et al. 2012 |
| FJ190220.1 | Florida | 1 Boykin et al. 2012 |
| FJ190221.1 | Florida | 1 Boykin et al. 2012 |
| FJ190222.1 | Florida | 1 Boykin et al. 2012 |
| FJ190223.1 | Florida | 1 Boykin et al. 2012 |
| FJ190224.1 | Florida | 1 Boykin et al. 2012 |
| FJ190225.1 | Florida | 1 Boykin et al. 2012 |
| FJ190226.1 | Florida | 1 Boykin et al. 2012 |
| FJ190227.1 | Florida | 1 Boykin et al. 2012 |
| FJ190232.1 | Florida | 1 Boykin et al. 2012 |
| FJ190233.1 | Florida | 1 Boykin et al. 2012 |
| FJ190234.1 | Florida | 1 Boykin et al. 2012 |
| FJ190235.1 | Florida | 1 Boykin et al. 2012 |
| FJ190236.1 | Florida | 1 Boykin et al. 2012 |
| FJ190237.1 | Florida | 1 Boykin et al. 2012 |
| FJ190238.1 | Florida | 1 Boykin et al. 2012 |
| FJ190239.1 | Florida | 1 Boykin et al. 2012 |
| FJ190240.1 | Florida | 1 Boykin et al. 2012 |
| FJ190241.1 | Florida | 1 Boykin et al. 2012 |
| FJ190242.1 | Florida | 1 Boykin et al. 2012 |
| FJ190243.1 | Florida | 1 Boykin et al. 2012 |
| FJ190244.1 | Florida | 1 Boykin et al. 2012 |
| FJ190245.1 | Florida | 1 Boykin et al. 2012 |
| FJ190246.1 | Florida | 1 Boykin et al. 2012 |
| FJ190247.1 | Florida | 1 Boykin et al. 2012 |
| FJ190249.1 | Florida | 1 Boykin et al. 2012 |
| FJ190250.1 | Florida | 1 Boykin et al. 2012 |
| FJ190251.1 | Florida | 1 Boykin et al. 2012 |
| FJ190252.1 | Florida | 1 Boykin et al. 2012 |
| FJ190254.1 | Florida | 1 Boykin et al. 2012 |
| FJ190255.1 | Florida | 1 Boykin et al. 2012 |
| FJ190256.1 | Florida | 1 Boykin et al. 2012 |
| FJ190257.1 | Florida | 1 Boykin et al. 2012 |
| FJ190258.1 | Florida | 1 Boykin et al. 2012 |
| FJ190259.1 | Florida | 1 Boykin et al. 2012 |
| FJ190277.1 | Florida | 1 Boykin et al. 2012 |
| FJ190278.1 | Florida | 1 Boykin et al. 2012 |

|            |            |                      |
|------------|------------|----------------------|
| FJ190310.1 | Florida    | 1 Boykin et al. 2012 |
| FJ190311.1 | Florida    | 1 Boykin et al. 2012 |
| FJ190372.1 | Florida    | 1 Boykin et al. 2012 |
| FJ190373.1 | Florida    | 1 Boykin et al. 2012 |
| FJ190374.1 | Florida    | 1 Boykin et al. 2012 |
| FJ190375.1 | Florida    | 1 Boykin et al. 2012 |
| FJ190376.1 | Florida    | 1 Boykin et al. 2012 |
| FJ190377.1 | Florida    | 1 Boykin et al. 2012 |
| KY426015.1 | Florida    | 1 Wu et al. 2017     |
| FJ190342.1 | India      | 1 Boykin et al. 2012 |
| FJ190343.1 | India      | 1 Boykin et al. 2012 |
| FJ190344.1 | India      | 1 Boykin et al. 2012 |
| FJ190345.1 | India      | 1 Boykin et al. 2012 |
| FJ190336.1 | Indonesia  | 1 Boykin et al. 2012 |
| FJ190306.1 | Mexico     | 1 Boykin et al. 2012 |
| FJ190307.1 | Mexico     | 1 Boykin et al. 2012 |
| FJ190308.1 | Mexico     | 1 Boykin et al. 2012 |
| FJ190309.1 | Mexico     | 1 Boykin et al. 2012 |
| FJ190290.1 | Pakistan   | 1 Boykin et al. 2012 |
| FJ190291.1 | Pakistan   | 1 Boykin et al. 2012 |
| FJ190292.1 | Pakistan   | 1 Boykin et al. 2012 |
| MF614828.1 | Pakistan   | 1 Wu et al. 2018     |
| FJ190318.1 | Reunion    | 1 Boykin et al. 2012 |
| FJ190337.1 | Saudi Arab | 1 Boykin et al. 2012 |
| FJ190338.1 | Saudi Arab | 1 Boykin et al. 2012 |
| FJ190339.1 | Saudi Arab | 1 Boykin et al. 2012 |
| FJ190340.1 | Saudi Arab | 1 Boykin et al. 2012 |
| FJ190341.1 | Saudi Arab | 1 Boykin et al. 2012 |
| FJ190177.1 | Texas      | 1 Boykin et al. 2012 |
| FJ190178.1 | Texas      | 1 Boykin et al. 2012 |
| FJ190179.1 | Texas      | 1 Boykin et al. 2012 |
| FJ190180.1 | Texas      | 1 Boykin et al. 2012 |
| FJ190181.1 | Texas      | 1 Boykin et al. 2012 |
| MF614822.1 | Baoshao, Y | 2 Wu et al. 2018     |
| MF614819.1 | Bingchuan, | 2 Wu et al. 2018     |
| FJ190228.1 | Brazil     | 2 Boykin et al. 2012 |
| FJ190229.1 | Brazil     | 2 Boykin et al. 2012 |
| FJ190230.1 | Brazil     | 2 Boykin et al. 2012 |
| FJ190231.1 | Brazil     | 2 Boykin et al. 2012 |
| FJ190325.1 | Brazil     | 2 Boykin et al. 2012 |
| FJ190326.1 | Brazil     | 2 Boykin et al. 2012 |
| FJ190327.1 | Brazil     | 2 Boykin et al. 2012 |
| FJ190328.1 | Brazil     | 2 Boykin et al. 2012 |
| FJ190329.1 | Brazil     | 2 Boykin et al. 2012 |
| FJ190330.1 | Brazil     | 2 Boykin et al. 2012 |
| FJ190331.1 | Brazil     | 2 Boykin et al. 2012 |
| FJ190332.1 | Brazil     | 2 Boykin et al. 2012 |

|            |              |                      |
|------------|--------------|----------------------|
| FJ190333.1 | Brazil       | 2 Boykin et al. 2012 |
| MF614824.1 | Cambodia     | 2 Wu et al. 2018     |
| FJ190357.1 | China        | 2 Boykin et al. 2012 |
| FJ190358.1 | China        | 2 Boykin et al. 2012 |
| FJ190359.1 | China        | 2 Boykin et al. 2012 |
| FJ190360.1 | China        | 2 Boykin et al. 2012 |
| FJ190361.1 | China        | 2 Boykin et al. 2012 |
| FJ190362.1 | China        | 2 Boykin et al. 2012 |
| FJ190363.1 | China        | 2 Boykin et al. 2012 |
| FJ190364.1 | China        | 2 Boykin et al. 2012 |
| FJ190366.1 | China        | 2 Boykin et al. 2012 |
| FJ190368.1 | China        | 2 Boykin et al. 2012 |
| FJ190369.1 | China        | 2 Boykin et al. 2012 |
| OM181946.1 | CRF-TW       | 2 This study         |
| OM181947.1 | CRF-UY       | 2 This study         |
| MF614808.1 | Fuzhou, Fu   | 2 Wu et al. 2018     |
| MF614810.1 | Guangchar    | 2 Wu et al. 2018     |
| MF614811.1 | Hainan, Ch   | 2 Wu et al. 2018     |
| MF614804.1 | Huizhou, G   | 2 Wu et al. 2018     |
| FJ190263.1 | Indonesia    | 2 Boykin et al. 2012 |
| FJ190264.1 | Indonesia    | 2 Boykin et al. 2012 |
| FJ190265.1 | Indonesia    | 2 Boykin et al. 2012 |
| FJ190266.1 | Indonesia    | 2 Boykin et al. 2012 |
| FJ190267.1 | Indonesia    | 2 Boykin et al. 2012 |
| FJ190268.1 | Indonesia    | 2 Boykin et al. 2012 |
| FJ190269.1 | Indonesia    | 2 Boykin et al. 2012 |
| FJ190270.1 | Indonesia    | 2 Boykin et al. 2012 |
| FJ190271.1 | Indonesia    | 2 Boykin et al. 2012 |
| FJ190279.1 | Indonesia    | 2 Boykin et al. 2012 |
| FJ190280.1 | Indonesia    | 2 Boykin et al. 2012 |
| FJ190281.1 | Indonesia    | 2 Boykin et al. 2012 |
| FJ190282.1 | Indonesia    | 2 Boykin et al. 2012 |
| MF614827.1 | Indonesia    | 2 Wu et al. 2018     |
| MF614809.1 | Ji'an, Jiang | 2 Wu et al. 2018     |
| MF614820.1 | Jianshui, Yt | 2 Wu et al. 2018     |
| MF614806.1 | Jieyang, Gu  | 2 Wu et al. 2018     |
| MF614825.1 | Malaysia     | 2 Wu et al. 2018     |
| FJ190312.1 | Mauritius    | 2 Boykin et al. 2012 |
| FJ190314.1 | Mauritius    | 2 Boykin et al. 2012 |
| FJ190315.1 | Mauritius    | 2 Boykin et al. 2012 |
| FJ190316.1 | Mauritius    | 2 Boykin et al. 2012 |
| MF614816.1 | Miyi, Sichu  | 2 Wu et al. 2018     |
| MF614813.1 | Nanning, G   | 2 Wu et al. 2018     |
| MF614817.1 | Ningnan, S   | 2 Wu et al. 2018     |
| FJ190317.1 | Reunion      | 2 Boykin et al. 2012 |
| FJ190319.1 | Reunion      | 2 Boykin et al. 2012 |
| FJ190320.1 | Reunion      | 2 Boykin et al. 2012 |

|            |             |                      |
|------------|-------------|----------------------|
| MF614821.1 | Ruili, Yunn | 2 Wu et al. 2018     |
| MF614803.1 | Shaoguan,   | 2 Wu et al. 2018     |
| FJ190284.1 | Taiwan      | 2 Boykin et al. 2012 |
| FJ190285.1 | Taiwan      | 2 Boykin et al. 2012 |
| FJ190286.1 | Taiwan      | 2 Boykin et al. 2012 |
| FJ190287.1 | Taiwan      | 2 Boykin et al. 2012 |
| MF614823.1 | Taiwan      | 2 Wu et al. 2018     |
| FJ190293.1 | Thailand    | 2 Boykin et al. 2012 |
| FJ190294.1 | Thailand    | 2 Boykin et al. 2012 |
| FJ190295.1 | Thailand    | 2 Boykin et al. 2012 |
| FJ190296.1 | Thailand    | 2 Boykin et al. 2012 |
| FJ190272.1 | Vietnam     | 2 Boykin et al. 2012 |
| FJ190273.1 | Vietnam     | 2 Boykin et al. 2012 |
| FJ190274.1 | Vietnam     | 2 Boykin et al. 2012 |
| FJ190275.1 | Vietnam     | 2 Boykin et al. 2012 |
| FJ190276.1 | Vietnam     | 2 Boykin et al. 2012 |
| FJ190378.1 | Vietnam     | 2 Boykin et al. 2012 |
| FJ190379.1 | Vietnam     | 2 Boykin et al. 2012 |
| FJ190380.1 | Vietnam     | 2 Boykin et al. 2012 |
| FJ190381.1 | Vietnam     | 2 Boykin et al. 2012 |
| FJ190382.1 | Vietnam     | 2 Boykin et al. 2012 |
| MF614826.1 | Vietnam     | 2 Wu et al. 2018     |
| MF614818.1 | Wangmo, C   | 2 Wu et al. 2018     |
| MF614807.1 | Xiamen, Fu  | 2 Wu et al. 2018     |
| MF614805.1 | Yangchun,   | 2 Wu et al. 2018     |
| MF614815.1 | Yizhang, Hi | 2 Wu et al. 2018     |
| MF614812.1 | Yulin, Guar | 2 Wu et al. 2018     |
| MF614814.1 | Zhejiang, C | 2 Wu et al. 2018     |
| FJ190248.1 | Florida     | 3 Boykin et al. 2012 |
| FJ190346.1 | Guadeloup   | 4 Boykin et al. 2012 |
| FJ190347.1 | Guadeloup   | 4 Boykin et al. 2012 |
| FJ190348.1 | Guadeloup   | 4 Boykin et al. 2012 |
| FJ190349.1 | Guadeloup   | 4 Boykin et al. 2012 |
| FJ190350.1 | Guadeloup   | 4 Boykin et al. 2012 |
| FJ190351.1 | Guadeloup   | 4 Boykin et al. 2012 |
| FJ190352.1 | Guadeloup   | 4 Boykin et al. 2012 |
| FJ190353.1 | Guadeloup   | 4 Boykin et al. 2012 |
| FJ190354.1 | Guadeloup   | 4 Boykin et al. 2012 |
| FJ190355.1 | Guadeloup   | 4 Boykin et al. 2012 |
| FJ190356.1 | Guadeloup   | 4 Boykin et al. 2012 |
| FJ190260.1 | Puerto Rico | 4 Boykin et al. 2012 |
| FJ190261.1 | Puerto Rico | 4 Boykin et al. 2012 |
| FJ190262.1 | Puerto Rico | 4 Boykin et al. 2012 |
| FJ190288.1 | Pakistan    | 5 Boykin et al. 2012 |
| FJ190289.1 | Pakistan    | 5 Boykin et al. 2012 |
| FJ190297.1 | China       | 6 Boykin et al. 2012 |
| FJ190298.1 | China       | 6 Boykin et al. 2012 |

|            |           |                      |
|------------|-----------|----------------------|
| FJ190299.1 | China     | 6 Boykin et al. 2012 |
| FJ190300.1 | Mexico    | 6 Boykin et al. 2012 |
| FJ190301.1 | Mexico    | 6 Boykin et al. 2012 |
| FJ190302.1 | Mexico    | 6 Boykin et al. 2012 |
| FJ190303.1 | Mexico    | 6 Boykin et al. 2012 |
| FJ190304.1 | Mexico    | 6 Boykin et al. 2012 |
| FJ190305.1 | Mexico    | 6 Boykin et al. 2012 |
| FJ190367.1 | China     | 7 Boykin et al. 2012 |
| FJ190313.1 | Mauritius | 2 Boykin et al. 2012 |



**Table S4.** Putative endogenous viral elements (EVEs) identified by BLASTx and filtering with custom Python scripts. Each *Diaphorina citri* population is in its own sheet.

**Table S4.1 – CRF-CA *D. citri* EVEs**

| sequence                                                                                            | length (aa) | perc identity (aa) | gaps | frame | position on hit start (aa) | position on hit stop (aa) | position on query start (nt) | position on query stop (nt) | evalue      | score | query id        |
|-----------------------------------------------------------------------------------------------------|-------------|--------------------|------|-------|----------------------------|---------------------------|------------------------------|-----------------------------|-------------|-------|-----------------|
| gnl BL ORD ID 32373 QLJ83484.1 ORF3 [Broome densovirus 1]                                           | 98          | 50.00              | 5    | -3    | 5                          | 102                       | 12508560                     | 12508838                    | 7.46E-17    | 238   | HiC_scaffold_3  |
| gnl BL ORD ID 23226 YP 009336527.1 hypothetical protein 4 [Beihai tombus-like virus 12]             | 165         | 24.85              | 0    | 3     | 288                        | 452                       | 1586568                      | 1587062                     | 0.000152793 | 147   | HiC_scaffold_3  |
| gnl BL ORD ID 33449 QTW97811.1 hypothetical protein [Mononegavirales sp.]                           | 373         | 38.61              | 11   | 2     | 7                          | 375                       | 2496674                      | 2497771                     | 5.15E-109   | 726   | HiC_scaffold_4  |
| gnl BL ORD ID 107580 QEM39187.1 glycoprotein [Aedes aegypti anphevirus]                             | 261         | 34.10              | 7    | 3     | 389                        | 643                       | 2497773                      | 2498552                     | 1.37E-104   | 412   | HiC_scaffold_4  |
| gnl BL ORD ID 92059 QEM39034.1 nonstructural protein [Bactericera trigonica densovirus]             | 237         | 32.91              | 25   | -2    | 202                        | 433                       | 21314350                     | 21315000                    | 2.61E-17    | 255   | HiC_scaffold_5  |
| gnl BL ORD ID 75136 AMK09235.1 nucleocapsid protein [Drosophila busckii rhabdovirus]                | 186         | 26.88              | 2    | -3    | 206                        | 389                       | 3951989                      | 3952546                     | 4.89E-08    | 175   | HiC_scaffold_6  |
| gnl BL ORD ID 124979 AJG39051.1 polymerase [Lishi spider virus 1]                                   | 553         | 27.49              | 16   | 3     | 1624                       | 2168                      | 1989807                      | 1991441                     | 1.21E-39    | 449   | HiC_scaffold_6  |
| gnl BL ORD ID 23226 YP 009336527.1 hypothetical protein 4 [Beihai tombus-like virus 12]             | 144         | 27.78              | 11   | -1    | 309                        | 441                       | 17305897                     | 17306328                    | 0.000387531 | 143   | HiC_scaffold_7  |
| gnl BL ORD ID 24043 QPB73984.1 glycoprotein [Megalopteran chu-related virus OKIAV119]               | 228         | 21.05              | 21   | -3    | 90                         | 315                       | 4998933                      | 4999559                     | 8.19E-09    | 183   | HiC_scaffold_8  |
| gnl BL ORD ID 19408 YP 009259672.1 polyprotein [Diaphorina citri flavi-like virus]                  | 929         | 77.07              | 38   | -2    | 1687                       | 2607                      | 16531627                     | 16534323                    | 0           | 3476  | HiC_scaffold_9  |
| gnl BL ORD ID 21035 QMP82317.1 nucleocapsid protein [Hemipteran orthomyxo-related virus OKIAV188]   | 101         | 39.60              | 4    | 3     | 1                          | 97                        | 831489                       | 831791                      | 0.000184381 | 144   | HiC_scaffold_9  |
| gnl BL ORD ID 48377 QMI58129.1 putative capsid protein, partial [Verdadero virus]                   | 400         | 34.50              | 45   | -2    | 53                         | 433                       | 12948882                     | 12950003                    | 1.30E-37    | 408   | HiC_scaffold_12 |
| gnl BL ORD ID 92059 QEM39034.1 nonstructural protein [Bactericera trigonica densovirus]             | 183         | 30.60              | 9    | -1    | 203                        | 385                       | 12964144                     | 12964665                    | 4.72E-13    | 217   | HiC_scaffold_12 |
| gnl BL ORD ID 12538 YP 009256211.1 putative nonstructural protein NS1 [Diaphorina citri densovirus] | 87          | 42.53              | 6    | -3    | 251                        | 332                       | 12948368                     | 12948625                    | 1.67E-06    | 162   | HiC_scaffold_12 |

|                                                                                                                  |     |       |    |    |      |      |         |         |             |     |                 |
|------------------------------------------------------------------------------------------------------------------|-----|-------|----|----|------|------|---------|---------|-------------|-----|-----------------|
| gnl BL ORD ID 72222 AVK59491.1 coat protein [Wuhan fly virus 6]                                                  | 317 | 36.59 | 9  | 2  | 98   | 410  | 5353295 | 5354230 | 1.44E-48    | 487 | HiC_scaffold_12 |
| gnl BL ORD ID 16485 QIJ56918.1 RNA-directed RNA polymerase [Scaphoideus titanus-associated partiti-like virus 1] | 167 | 51.50 | 0  | -2 | 298  | 464  | 1444757 | 1445257 | 1.24E-46    | 475 | HiC_scaffold_13 |
| gnl BL ORD ID 92059 QEM39034.1 nonstructural protein [Bactericera trigonica densovirus]                          | 306 | 33.01 | 29 | -2 | 202  | 499  | 1445741 | 1446595 | 5.01E-33    | 359 | HiC_scaffold_13 |
| gnl BL ORD ID 92059 QEM39034.1 nonstructural protein [Bactericera trigonica densovirus]                          | 108 | 37.04 | 4  | -1 | 222  | 329  | 1484910 | 1485221 | 4.49E-09    | 183 | HiC_scaffold_13 |
| gnl BL ORD ID 110597 ASA47282.1 RdRp [Culex mononega-like virus 1]                                               | 196 | 34.18 | 6  | -2 | 140  | 330  | 1144889 | 1145473 | 8.10E-33    | 330 | HiC_scaffold_13 |
| gnl BL ORD ID 12538 YP 009256211.1 putative nonstructural protein NS1 [Diaphorina citri densovirus]              | 27  | 48.15 | 0  | -1 | 505  | 531  | 1445589 | 1445669 | 3.84E-30    | 81  | HiC_scaffold_13 |
| gnl BL ORD ID 12538 YP 009256211.1 putative nonstructural protein NS1 [Diaphorina citri densovirus]              | 115 | 33.91 | 17 | -2 | 177  | 287  | 1461323 | 1461628 | 5.69E-11    | 159 | HiC_scaffold_13 |
| gnl BL ORD ID 12538 YP 009256211.1 putative nonstructural protein NS1 [Diaphorina citri densovirus]              | 59  | 38.98 | 1  | -1 | 309  | 366  | 1461099 | 1461275 | 5.69E-11    | 81  | HiC_scaffold_13 |
| gnl BL ORD ID 79329 QBK47204.1 RdRP [Anopheles darlingi virus]                                                   | 210 | 33.81 | 6  | -2 | 91   | 295  | 1144886 | 1145512 | 1.00E-27    | 309 | HiC_scaffold_13 |
| gnl BL ORD ID 41450 YP 009256210.1 putative nonstructural protein [Diaphorina citri densovirus]                  | 160 | 35.00 | 2  | 3  | 274  | 432  | 6375405 | 6375881 | 4.36E-20    | 178 | HiC_scaffold_13 |
| gnl BL ORD ID 113173 QEM39033.1 nonstructural protein [Bactericera trigonica densovirus]                         | 128 | 26.56 | 4  | 2  | 137  | 263  | 6374999 | 6375373 | 2.63E-19    | 156 | HiC_scaffold_13 |
| gnl BL ORD ID 124979 AJG39051.1 polymerase [Lishi spider virus 1]                                                | 97  | 53.61 | 3  | -3 | 1180 | 1274 | 9565156 | 9565443 | 2.64E-18    | 264 | HiC_scaffold_13 |
| gnl BL ORD ID 48377 QMI58129.1 putative capsid protein, partial [Verdadero virus]                                | 265 | 33.58 | 30 | 1  | 103  | 356  | 2371903 | 2372640 | 1.08E-17    | 251 | HiC_scaffold_13 |
| gnl BL ORD ID 31292 QMP82337.1 RNA-dependent RNA polymerase, partial [Coleopteran chu-related virus OKIAV151]    | 101 | 36.63 | 0  | -1 | 896  | 996  | 9564369 | 9564671 | 1.50E-07    | 171 | HiC_scaffold_13 |
| gnl BL ORD ID 24376 QMP82266.1 hemagglutinin, partial [Hemipteran orthomyxo-related virus OKIAV188]              | 142 | 28.17 | 8  | -2 | 292  | 426  | 9556193 | 9556615 | 1.15E-09    | 186 | HiC_scaffold_13 |
| gnl BL ORD ID 116272 AYP67573.1 PB1 [Old quarry swamp virus]                                                     | 45  | 60.00 | 0  | -1 | 656  | 700  | 1462839 | 1462973 | 0.000116508 | 145 | HiC_scaffold_13 |

**Table S4.2 – CRF-TW EVEs**

| sequence                                                                                                   | length<br>(aa) | perc<br>identity<br>(aa) | gaps | frame | position<br>on hit<br>start<br>(aa) | position<br>on hit<br>stop (aa) | position<br>on query<br>start (nt) | position<br>on query<br>stop (nt) | evaluate | score | query id        |
|------------------------------------------------------------------------------------------------------------|----------------|--------------------------|------|-------|-------------------------------------|---------------------------------|------------------------------------|-----------------------------------|----------|-------|-----------------|
| gnl BL ORD ID 54230 QRD99908.1 capsid<br>[Dragana partiti-like virus]                                      | 183            | 29.51                    | 15   | -2    | 225                                 | 407                             | 24205312                           | 24205815                          | 1.23E-26 | 200   | HiC_scaffold_2  |
| gnl BL ORD ID 32373 QLJ83484.1 ORF3 [Broome<br>densovirus 1]                                               | 98             | 50.00                    | 5    | -1    | 5                                   | 102                             | 12636371                           | 12636649                          | 4.24E-17 | 240   | HiC_scaffold_3  |
| gnl BL ORD ID 24043 QPB73984.1 glycoprotein<br>[Megalopteran chu-related virus OKIAV119]                   | 228            | 21.05                    | 21   | -2    | 90                                  | 315                             | 8847055                            | 8847681                           | 1.05E-08 | 183   | HiC_scaffold_3  |
| gnl BL ORD ID 33835 YP 004063985.1 non-<br>structural polyprotein [Mud crab virus]                         | 125            | 28.80                    | 25   | -3    | 1297                                | 1396                            | 24144576                           | 24144950                          | 0.000918 | 142   | HiC_scaffold_4  |
| gnl BL ORD ID 12538 YP 009256211.1 putative<br>nonstructural protein NS1 [Diaphorina citri<br>densovirus]  | 110            | 35.45                    | 9    | -1    | 190                                 | 299                             | 21640971                           | 21641273                          | 2.05E-05 | 154   | HiC_scaffold_5  |
| gnl BL ORD ID 23226 YP 009336527.1<br>hypothetical protein 4 [Beihai tombus-like virus<br>12]              | 146            | 34.93                    | 0    | -1    | 314                                 | 459                             | 682286                             | 682723                            | 2.39E-05 | 154   | HiC_scaffold_6  |
| gnl BL ORD ID 124979 AJG39051.1 polymerase<br>[Lishi spider virus 1]                                       | 489            | 36.81                    | 12   | 3     | 1087                                | 1566                            | 2218230                            | 2219687                           | 2.81E-76 | 763   | HiC_scaffold_6  |
| gnl BL ORD ID 124979 AJG39051.1 polymerase<br>[Lishi spider virus 1]                                       | 238            | 31.09                    | 3    | 2     | 1711                                | 1947                            | 2220776                            | 2221483                           | 1.29E-25 | 291   | HiC_scaffold_6  |
| gnl BL ORD ID 43041 QPL15312.1 RNA-dependent<br>RNA polymerase [Orthopteran chu-related virus<br>OKIAV152] | 111            | 45.95                    | 0    | 3     | 355                                 | 465                             | 2216754                            | 2217086                           | 5.06E-38 | 290   | HiC_scaffold_6  |
| gnl BL ORD ID 43041 QPL15312.1 RNA-dependent<br>RNA polymerase [Orthopteran chu-related virus<br>OKIAV152] | 48             | 60.42                    | 0    | 2     | 496                                 | 543                             | 2217170                            | 2217313                           | 5.06E-38 | 162   | HiC_scaffold_6  |
| gnl BL ORD ID 75136 AMK09235.1 nucleocapsid<br>protein [Drosophila busckii rhabdovirus]                    | 109            | 34.86                    | 6    | -2    | 287                                 | 389                             | 4333312                            | 4333638                           | 0.000484 | 142   | HiC_scaffold_6  |
| gnl BL ORD ID 19408 YP 009259672.1 polyprotein<br>[Diaphorina citri flavi-like virus]                      | 929            | 77.07                    | 38   | -1    | 1687                                | 2607                            | 15741407                           | 15744103                          | 0        | 3476  | HiC_scaffold_7  |
| gnl BL ORD ID 19408 YP 009259672.1 polyprotein<br>[Diaphorina citri flavi-like virus]                      | 929            | 77.07                    | 38   | -2    | 1687                                | 2607                            | 15456873                           | 15459569                          | 0        | 3476  | HiC_scaffold_9  |
| gnl BL ORD ID 54230 QRD99908.1 capsid<br>[Dragana partiti-like virus]                                      | 264            | 33.33                    | 7    | 2     | 54                                  | 316                             | 12950432                           | 12951205                          | 1.65E-39 | 423   | HiC_scaffold_11 |
| gnl BL ORD ID 100122 QEM39036.1 VP4<br>[Bactericera trigonica densovirus]                                  | 217            | 37.33                    | 27   | 3     | 334                                 | 535                             | 13377762                           | 13378376                          | 5.53E-25 | 314   | HiC_scaffold_12 |
| gnl BL ORD ID 23242 YP 009336731.1<br>hypothetical protein 1 [Shuangao toti-like virus]                    | 201            | 24.88                    | 17   | -1    | 548                                 | 740                             | 13388967                           | 13389542                          | 9.37E-07 | 165   | HiC_scaffold_12 |
| gnl BL ORD ID 12538 YP 009256211.1 putative<br>nonstructural protein NS1 [Diaphorina citri<br>densovirus]  | 484            | 42.15                    | 11   | -3    | 196                                 | 675                             | 13378672                           | 13380102                          | 2.2E-102 | 917   | HiC_scaffold_12 |
| gnl BL ORD ID 12538 YP 009256211.1 putative<br>nonstructural protein NS1 [Diaphorina citri<br>densovirus]  | 87             | 42.53                    | 6    | -1    | 251                                 | 332                             | 13365708                           | 13365965                          | 8.42E-07 | 165   | HiC_scaffold_12 |

|                                                                                                     |     |       |    |    |      |      |          |          |          |      |                 |
|-----------------------------------------------------------------------------------------------------|-----|-------|----|----|------|------|----------|----------|----------|------|-----------------|
| gnl BL ORD ID 48377 QMI58129.1 putative capsid protein, partial [Verdadero virus]                   | 409 | 33.99 | 47 | -3 | 53   | 442  | 13366195 | 13367337 | 2.37E-36 | 398  | HiC_scaffold_12 |
| gnl BL ORD ID 92059 QEM39034.1 nonstructural protein [Bactericera trigonica densovirus]             | 108 | 37.04 | 4  | 3  | 222  | 329  | 1678965  | 1679276  | 4.88E-09 | 183  | HiC_scaffold_13 |
| gnl BL ORD ID 2569 QRW42585.1 polymerase PA [Guadeloupe mosquito quaranja-like virus 1]             | 54  | 53.70 | 0  | 2  | 10   | 63   | 1716941  | 1717102  | 2.18E-06 | 160  | HiC_scaffold_13 |
| gnl BL ORD ID 116272 AYP67573.1 PB1 [Old quarry swamp virus]                                        | 45  | 60.00 | 0  | 1  | 656  | 700  | 1706170  | 1706304  | 0.000127 | 145  | HiC_scaffold_13 |
| gnl BL ORD ID 109953 APG79108.1 RNA-dependent RNA polymerase [Hubei lepidoptera virus 4]            | 247 | 35.63 | 9  | -2 | 428  | 668  | 1436258  | 1436989  | 2.4E-107 | 354  | HiC_scaffold_13 |
| gnl BL ORD ID 102424 APG79114.1 RdRp [Hubei reo-like virus 12]                                      | 153 | 47.06 | 0  | -3 | 691  | 843  | 1435798  | 1436256  | 3.8E-98  | 267  | HiC_scaffold_13 |
| gnl BL ORD ID 124979 AJG39051.1 polymerase [Lishi spider virus 1]                                   | 237 | 46.84 | 9  | 1  | 1139 | 1369 | 11336422 | 11337123 | 1.29E-45 | 498  | HiC_scaffold_13 |
| gnl BL ORD ID 124979 AJG39051.1 polymerase [Lishi spider virus 1]                                   | 133 | 33.83 | 2  | 2  | 1356 | 1487 | 11337086 | 11337481 | 1.42E-11 | 206  | HiC_scaffold_13 |
| gnl BL ORD ID 26364 QRW41688.1 RNA-dependent RNA polymerase [Lasigmu virus]                         | 424 | 32.31 | 20 | -3 | 10   | 428  | 1436953  | 1438179  | 3.45E-45 | 492  | HiC_scaffold_13 |
| gnl BL ORD ID 48377 QMI58129.1 putative capsid protein, partial [Verdadero virus]                   | 295 | 33.22 | 30 | 2  | 73   | 356  | 2505944  | 2506771  | 4.08E-20 | 270  | HiC_scaffold_13 |
| gnl BL ORD ID 48377 QMI58129.1 putative capsid protein, partial [Verdadero virus]                   | 299 | 32.78 | 30 | 2  | 73   | 360  | 2507429  | 2508268  | 4.23E-20 | 270  | HiC_scaffold_13 |
| gnl BL ORD ID 48377 QMI58129.1 putative capsid protein, partial [Verdadero virus]                   | 207 | 36.71 | 22 | 3  | 103  | 300  | 2504721  | 2505302  | 1.12E-17 | 251  | HiC_scaffold_13 |
| gnl BL ORD ID 113173 QEM39033.1 nonstructural protein [Bactericera trigonica densovirus]            | 128 | 26.56 | 4  | 1  | 137  | 263  | 6506233  | 6506607  | 2.96E-19 | 156  | HiC_scaffold_13 |
| gnl BL ORD ID 12538 YP 009256211.1 putative nonstructural protein NS1 [Diaphorina citri densovirus] | 169 | 36.69 | 2  | 1  | 259  | 426  | 6506632  | 6507135  | 1.24E-15 | 238  | HiC_scaffold_13 |
| gnl BL ORD ID 12538 YP 009256211.1 putative nonstructural protein NS1 [Diaphorina citri densovirus] | 115 | 33.91 | 17 | 2  | 177  | 287  | 1707515  | 1707820  | 4.2E-11  | 159  | HiC_scaffold_13 |
| gnl BL ORD ID 12538 YP 009256211.1 putative nonstructural protein NS1 [Diaphorina citri densovirus] | 59  | 40.68 | 1  | 1  | 309  | 366  | 1707868  | 1708044  | 4.2E-11  | 82   | HiC_scaffold_13 |
| gnl BL ORD ID 33449 QTW97811.1 hypothetical protein [Mononegavirales sp.]                           | 604 | 35.43 | 12 | -3 | 7    | 605  | 21147    | 22937    | 1.1E-129 | 1101 | HiC_scaffold_24 |
| gnl BL ORD ID 92059 QEM39034.1 nonstructural protein [Bactericera trigonica densovirus]             | 77  | 35.06 | 3  | 2  | 252  | 328  | 28637    | 28858    | 1.15E-05 | 134  | HiC_scaffold_25 |
| gnl BL ORD ID 35151 YP 009179392.1 hypothetical protein [Shuangao insect virus 7]                   | 109 | 33.03 | 8  | 2  | 29   | 135  | 30992    | 31300    | 2.59E-05 | 121  | HiC_scaffold_25 |
| gnl BL ORD ID 41450 YP 009256210.1 putative nonstructural protein [Diaphorina citri densovirus]     | 108 | 35.19 | 6  | 2  | 150  | 251  | 23621    | 23944    | 0.000712 | 118  | HiC_scaffold_25 |
| gnl BL ORD ID 92059 QEM39034.1 nonstructural protein [Bactericera trigonica densovirus]             | 108 | 37.04 | 4  | 1  | 222  | 329  | 24670    | 24981    | 2.3E-11  | 183  | HiC_scaffold_25 |
| gnl BL ORD ID 33449 QTW97811.1 hypothetical protein [Mononegavirales sp.]                           | 604 | 35.43 | 12 | -3 | 7    | 605  | 41871    | 43661    | 9.5E-130 | 1101 | HiC_scaffold_31 |

**Table S4.3 – CRF-UY EVEs**

| sequence                                                                                                    | length<br>(aa) | perc<br>identity<br>(aa) | gaps | frame | position<br>on hit<br>start (aa) | position<br>on hit<br>stop<br>(aa) | position<br>on query<br>start (nt) | position<br>on query<br>stop (nt) | evaluate | score | query id        |
|-------------------------------------------------------------------------------------------------------------|----------------|--------------------------|------|-------|----------------------------------|------------------------------------|------------------------------------|-----------------------------------|----------|-------|-----------------|
| gnl BL ORD ID 32373 QJ83484.1 ORF3 [Broome<br>dengue virus 1]                                               | 98             | 50.00                    | 5    | -1    | 5                                | 102                                | 12112354                           | 12112632                          | 4.09E-17 | 240   | HiC_scaffold_3  |
| gnl BL ORD ID 33449 QJ97811.1 hypothetical<br>protein [Mononegavirales sp.]                                 | 604            | 35.43                    | 12   | 3     | 7                                | 605                                | 2344587                            | 2346377                           | 4.6E-127 | 1101  | HiC_scaffold_4  |
| gnl BL ORD ID 43041 QPL15312.1 RNA-dependent<br>RNA polymerase [Orthopteran chu-related virus<br>OKIAV152]  | 111            | 45.95                    | 0    | 3     | 355                              | 465                                | 1938036                            | 1938368                           | 4.87E-38 | 290   | HiC_scaffold_6  |
| gnl BL ORD ID 43041 QPL15312.1 RNA-dependent<br>RNA polymerase [Orthopteran chu-related virus<br>OKIAV152]  | 48             | 60.42                    | 0    | 2     | 496                              | 543                                | 1938452                            | 1938595                           | 4.87E-38 | 162   | HiC_scaffold_6  |
| gnl BL ORD ID 102284 API61887.1 RNA-directed<br>RNA polymerase [Chuvirus Mos8Chu0]                          | 286            | 25.87                    | 21   | 3     | 1735                             | 2010                               | 1942059                            | 1942883                           | 1.21E-12 | 218   | HiC_scaffold_6  |
| gnl BL ORD ID 75136 AMK09235.1 nucleocapsid<br>protein [Drosophila busckii rhabdovirus]                     | 186            | 26.88                    | 2    | -1    | 206                              | 389                                | 3885142                            | 3885699                           | 4.88E-08 | 175   | HiC_scaffold_6  |
| gnl BL ORD ID 23226 YP 009336527.1 hypothetical<br>protein 4 [Beihai tombus-like virus 12]                  | 137            | 36.50                    | 0    | -1    | 314                              | 450                                | 583633                             | 584043                            | 7.5E-07  | 166   | HiC_scaffold_6  |
| gnl BL ORD ID 124979 AJG39051.1 polymerase<br>[Lishi spider virus 1]                                        | 489            | 36.81                    | 12   | 3     | 1087                             | 1566                               | 1939512                            | 1940969                           | 2.69E-76 | 763   | HiC_scaffold_6  |
| gnl BL ORD ID 124979 AJG39051.1 polymerase<br>[Lishi spider virus 1]                                        | 206            | 33.98                    | 3    | 3     | 1743                             | 1947                               | 1942155                            | 1942766                           | 2.99E-26 | 294   | HiC_scaffold_6  |
| gnl BL ORD ID 75720 AXQ04844.1 hypothetical<br>protein, partial [Bidnavirus-like Culex mosquito<br>virus]   | 395            | 31.14                    | 38   | -3    | 259                              | 622                                | 1765894                            | 1767057                           | 6.45E-31 | 365   | HiC_scaffold_8  |
| gnl BL ORD ID 19408 YP 009259672.1 polyprotein<br>[Diaphorina citri flavi-like virus]                       | 929            | 77.07                    | 38   | -3    | 1687                             | 2607                               | 14631711                           | 14634407                          | 0        | 3476  | HiC_scaffold_10 |
| gnl BL ORD ID 54230 QRD99908.1 capsid [Dragana<br>partiti-like virus]                                       | 264            | 33.33                    | 7    | -2    | 54                               | 316                                | 2337676                            | 2338449                           | 1.47E-39 | 423   | HiC_scaffold_11 |
| gnl BL ORD ID 12538 YP 009256211.1 putative<br>nonstructural protein NS1 [Diaphorina citri<br>dengue virus] | 484            | 42.15                    | 11   | -3    | 196                              | 675                                | 11964921                           | 11966351                          | 2E-102   | 917   | HiC_scaffold_12 |
| gnl BL ORD ID 23242 YP 009336731.1 hypothetical<br>protein 1 [Shuangao toti-like virus]                     | 201            | 24.88                    | 17   | -3    | 548                              | 740                                | 11975217                           | 11975792                          | 8.5E-07  | 165   | HiC_scaffold_12 |
| gnl BL ORD ID 12538 YP 009256211.1 putative<br>nonstructural protein NS1 [Diaphorina citri<br>dengue virus] | 87             | 42.53                    | 6    | -2    | 251                              | 332                                | 11951968                           | 11952225                          | 7.64E-07 | 165   | HiC_scaffold_12 |
| gnl BL ORD ID 48377 QMI58129.1 putative capsid<br>protein, partial [Verdadero virus]                        | 409            | 33.99                    | 47   | -1    | 53                               | 442                                | 11952455                           | 11953597                          | 2.15E-36 | 398   | HiC_scaffold_12 |
| gnl BL ORD ID 72222 AVK59491.1 coat protein<br>[Wuhan fly virus 6]                                          | 215            | 38.14                    | 6    | 2     | 184                              | 393                                | 4546442                            | 4547083                           | 1.12E-30 | 351   | HiC_scaffold_12 |
| gnl BL ORD ID 100122 QEM39036.1 VP4<br>[Bactericera trigonica dengue virus]                                 | 217            | 37.33                    | 27   | 2     | 334                              | 535                                | 11964011                           | 11964625                          | 5.02E-25 | 314   | HiC_scaffold_12 |

|                                                                                                                  |     |       |    |    |      |      |         |         |          |     |                  |
|------------------------------------------------------------------------------------------------------------------|-----|-------|----|----|------|------|---------|---------|----------|-----|------------------|
| gnl BL ORD ID 12538 YP 009256211.1 putative nonstructural protein NS1 [Diaphorina citri densovirus]              | 27  | 48.15 | 0  | -3 | 505  | 531  | 1368365 | 1368445 | 2.9E-30  | 81  | HiC_scaffold_13  |
| gnl BL ORD ID 12538 YP 009256211.1 putative nonstructural protein NS1 [Diaphorina citri densovirus]              | 115 | 33.91 | 17 | -1 | 177  | 287  | 1384099 | 1384404 | 5.05E-11 | 159 | HiC_scaffold_13  |
| gnl BL ORD ID 12538 YP 009256211.1 putative nonstructural protein NS1 [Diaphorina citri densovirus]              | 59  | 38.98 | 1  | -3 | 309  | 366  | 1383875 | 1384051 | 5.05E-11 | 81  | HiC_scaffold_13  |
| gnl BL ORD ID 116272 AYP67573.1 PB1 [Old quarry swamp virus]                                                     | 45  | 60.00 | 0  | -3 | 656  | 700  | 1385615 | 1385749 | 0.000103 | 145 | HiC_scaffold_13  |
| gnl BL ORD ID 48377 QMI58129.1 putative capsid protein, partial [Verdadero virus]                                | 265 | 33.58 | 30 | 3  | 103  | 356  | 2126178 | 2126915 | 9.57E-18 | 251 | HiC_scaffold_13  |
| gnl BL ORD ID 24376 QMP82266.1 hemagglutinin, partial [Hemipteran orthomyxo-related virus OKIAV188]              | 435 | 20.46 | 26 | -1 | 1    | 426  | 9451357 | 9452610 | 1.82E-11 | 200 | HiC_scaffold_13  |
| gnl BL ORD ID 102424 APG79114.1 RdRp [Hubei reo-like virus 12]                                                   | 153 | 47.06 | 0  | -1 | 691  | 843  | 1135378 | 1135836 | 3.21E-98 | 267 | HiC_scaffold_13  |
| gnl BL ORD ID 16485 QIJ56918.1 RNA-directed RNA polymerase [Scaphoideus titanus-associated partiti-like virus 1] | 167 | 51.50 | 0  | -1 | 298  | 464  | 1367533 | 1368033 | 1.09E-46 | 475 | HiC_scaffold_13  |
| gnl BL ORD ID 26364 QRW41688.1 RNA-dependent RNA polymerase [Lasigmu virus]                                      | 424 | 32.31 | 20 | -1 | 10   | 428  | 1136533 | 1137759 | 2.81E-45 | 492 | HiC_scaffold_13  |
| gnl BL ORD ID 92059 QEM39034.1 nonstructural protein [Bactericera trigonica densovirus]                          | 306 | 33.01 | 29 | -1 | 202  | 499  | 1368517 | 1369371 | 4.44E-33 | 359 | HiC_scaffold_13  |
| gnl BL ORD ID 92059 QEM39034.1 nonstructural protein [Bactericera trigonica densovirus]                          | 108 | 37.04 | 4  | -1 | 222  | 329  | 1410475 | 1410786 | 3.97E-09 | 183 | HiC_scaffold_13  |
| gnl BL ORD ID 124979 AJG39051.1 polymerase [Lishi spider virus 1]                                                | 56  | 41.07 | 0  | -3 | 1432 | 1487 | 166     | 333     | 7.04E-11 | 130 | HiC_scaffold_234 |
| gnl BL ORD ID 31292 QMP82337.1 RNA-dependent RNA polymerase, partial [Coleopteran chu-related virus OKIAV151]    | 69  | 36.23 | 7  | -3 | 957  | 1018 | 199     | 405     | 8.49E-05 | 114 | HiC_scaffold_234 |
| gnl BL ORD ID 124979 AJG39051.1 polymerase [Lishi spider virus 1]                                                | 195 | 45.13 | 5  | -1 | 1178 | 1369 | 891     | 1469    | 3.74E-45 | 413 | HiC_scaffold_319 |

**Table S5.** Mitochondrial CO1 haplotypes by locality.

|                    |              | mtDNA CO1 Haplotypes |    |   |    |   |   |   |       |
|--------------------|--------------|----------------------|----|---|----|---|---|---|-------|
|                    | Locality     | 1                    | 2  | 3 | 4  | 5 | 6 | 7 | Total |
| SEA Asia           | China        | 0                    | 31 | 0 | 0  | 0 | 3 | 1 | 35    |
|                    | Taiwan       | 0                    | 5  | 0 | 0  | 0 | 0 | 0 | 5     |
|                    | Vietnam      | 0                    | 11 | 0 | 0  | 0 | 0 | 0 | 11    |
|                    | Cambodia     | 0                    | 1  | 0 | 0  | 0 | 0 | 0 | 1     |
|                    | Indonesia    | 1                    | 14 | 0 | 0  | 0 | 0 | 0 | 15    |
|                    | Malaysia     | 0                    | 1  | 0 | 0  | 0 | 0 | 0 | 1     |
|                    | Thailand     | 0                    | 4  | 0 | 0  | 0 | 0 | 0 | 4     |
| South Asia         | India        | 4                    | 0  | 0 | 0  | 0 | 0 | 0 | 4     |
|                    | Pakistan     | 4                    | 0  | 0 | 0  | 2 | 0 | 0 | 6     |
|                    | Saudi Arabia | 5                    | 0  | 0 | 0  | 0 | 0 | 0 | 5     |
| Indian Ocean Isles | Mauritius    | 0                    | 5  | 0 | 0  | 0 | 0 | 0 | 5     |
|                    | Reunion      | 1                    | 3  | 0 | 0  | 0 | 0 | 0 | 4     |
|                    | Brazil       | 4                    | 13 | 0 | 0  | 0 | 0 | 0 | 17    |
| Caribbean          | Guadeloupe   | 0                    | 0  | 0 | 11 | 0 | 0 | 0 | 11    |
|                    | Puerto Rico  | 0                    | 0  | 0 | 3  | 0 | 0 | 0 | 3     |
|                    | Florida      | 93                   | 0  | 1 | 0  | 0 | 0 | 0 | 94    |
|                    | Texas        | 5                    | 0  | 0 | 0  | 0 | 0 | 0 | 5     |
|                    | Mexico       | 4                    | 0  | 0 | 0  | 0 | 6 | 0 | 10    |
|                    | California   | 1                    | 0  | 0 | 0  | 0 | 0 | 0 | 1     |
|                    | CRF-CA       | 1                    | 0  | 0 | 0  | 0 | 0 | 0 | 1     |
|                    | CRF-UY       | 0                    | 1  | 0 | 0  | 0 | 0 | 0 | 1     |
|                    | CRF-TW       | 0                    | 1  | 0 | 0  | 0 | 0 | 0 | 1     |
|                    | Total        | 123                  | 90 | 1 | 14 | 2 | 9 | 1 | 240   |

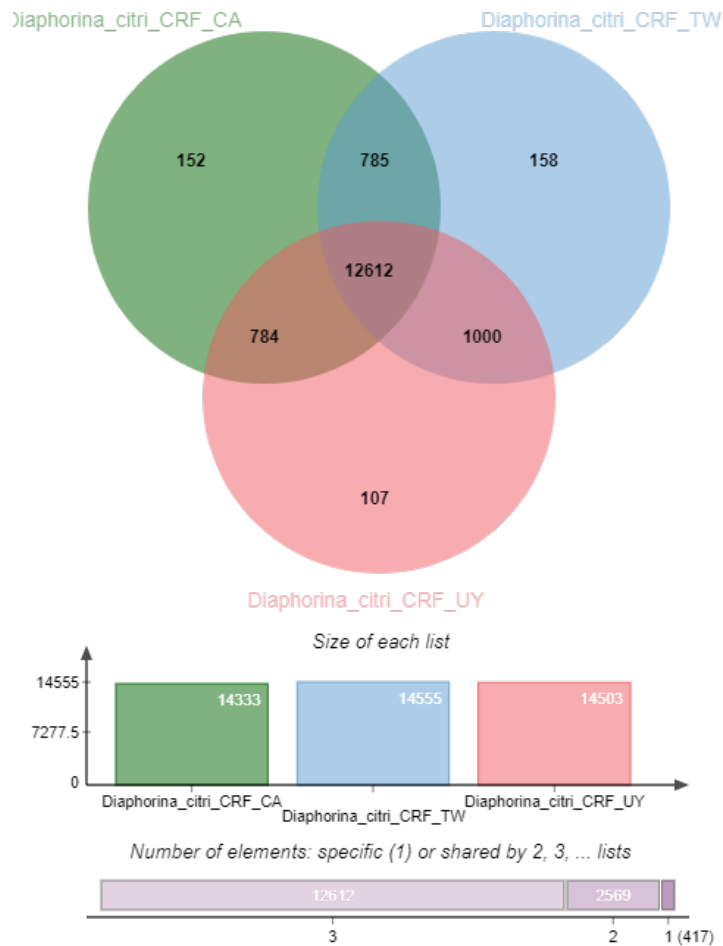

902

903 **Supplemental Figure 1.** OrthoVenn2 orthologous protein-clustering Venn diagram. Numbers within circles are protein ortholog  
 904 group numbers. Numbers within overlapping regions of circles represent the number of shared ortholog clusters between each protein  
 905 set: CRF-CA *D. citri* (green); CRF-TW *D. citri* (blue); CRF-UY *D. citri* (pink).



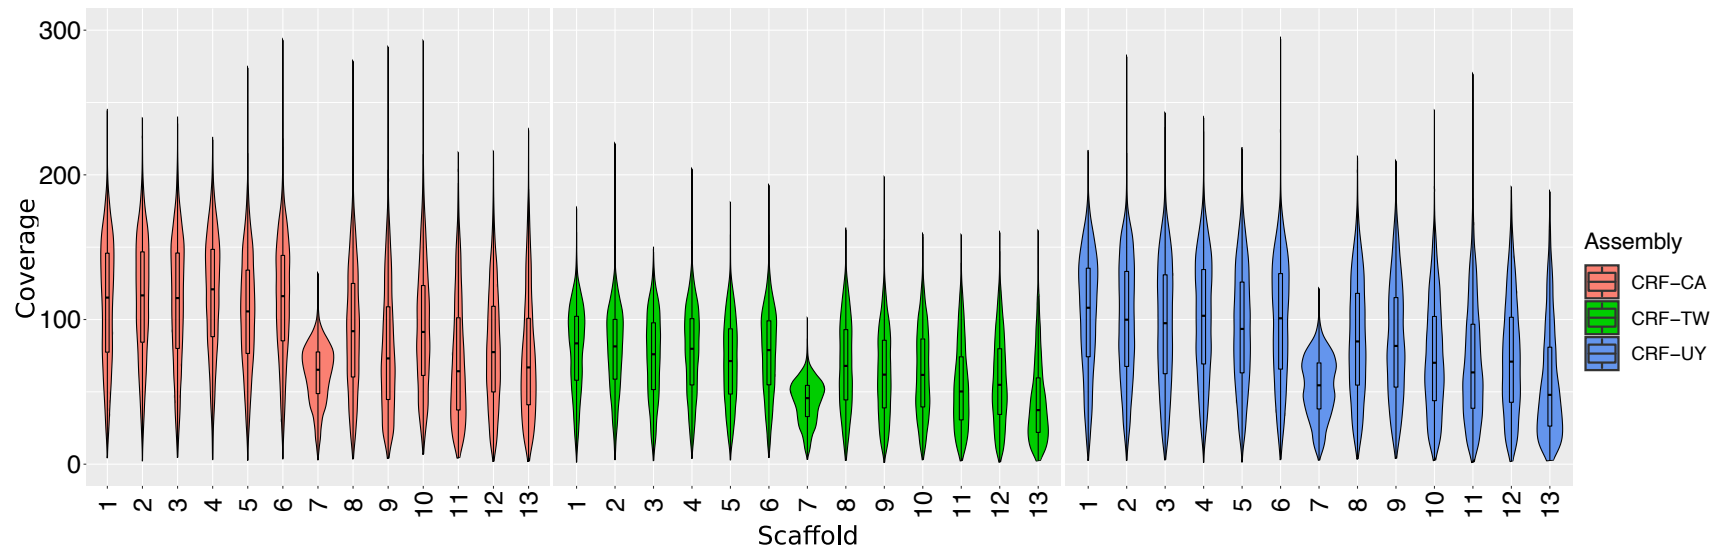

906

907 **Supplemental Figure 2.** Male-only, ultra-low input HiFi PacBio sequencing average coverage per superscaffold (chromosome)  
908 across 10 Kb sliding windows of CRF-CA, CRF-TW, and CRF-UY.

909

910

911

912

913

914

915

916

917

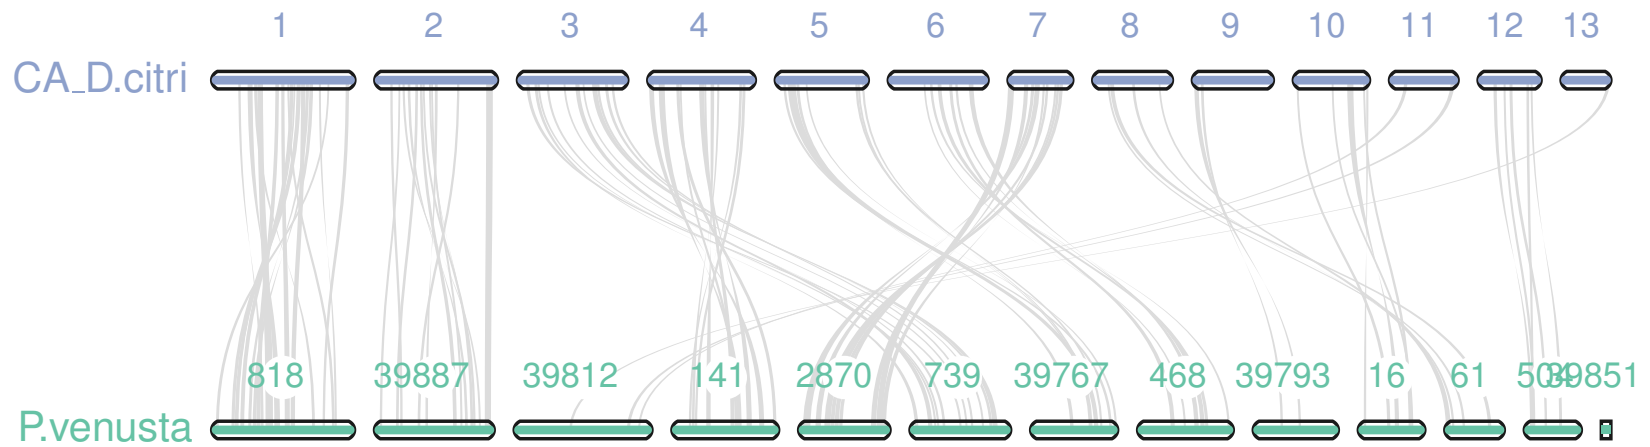

918

919 **Supplemental Figure 3.** Genome synteny plot highlighting syntenic blocks between CRF-CA *D. citri* and *Pachypsylla venusta*  
 920 (hackberry petiole gall psyllid). Bars represent chromosomes. Numbers above bars refer to the chromosome's scaffold number in  
 921 the assembly. Lines between bars represent syntenic links. *P. venusta* scaffold 2870 is the X chromosome in that species.

922

923

924

925

926

927

928

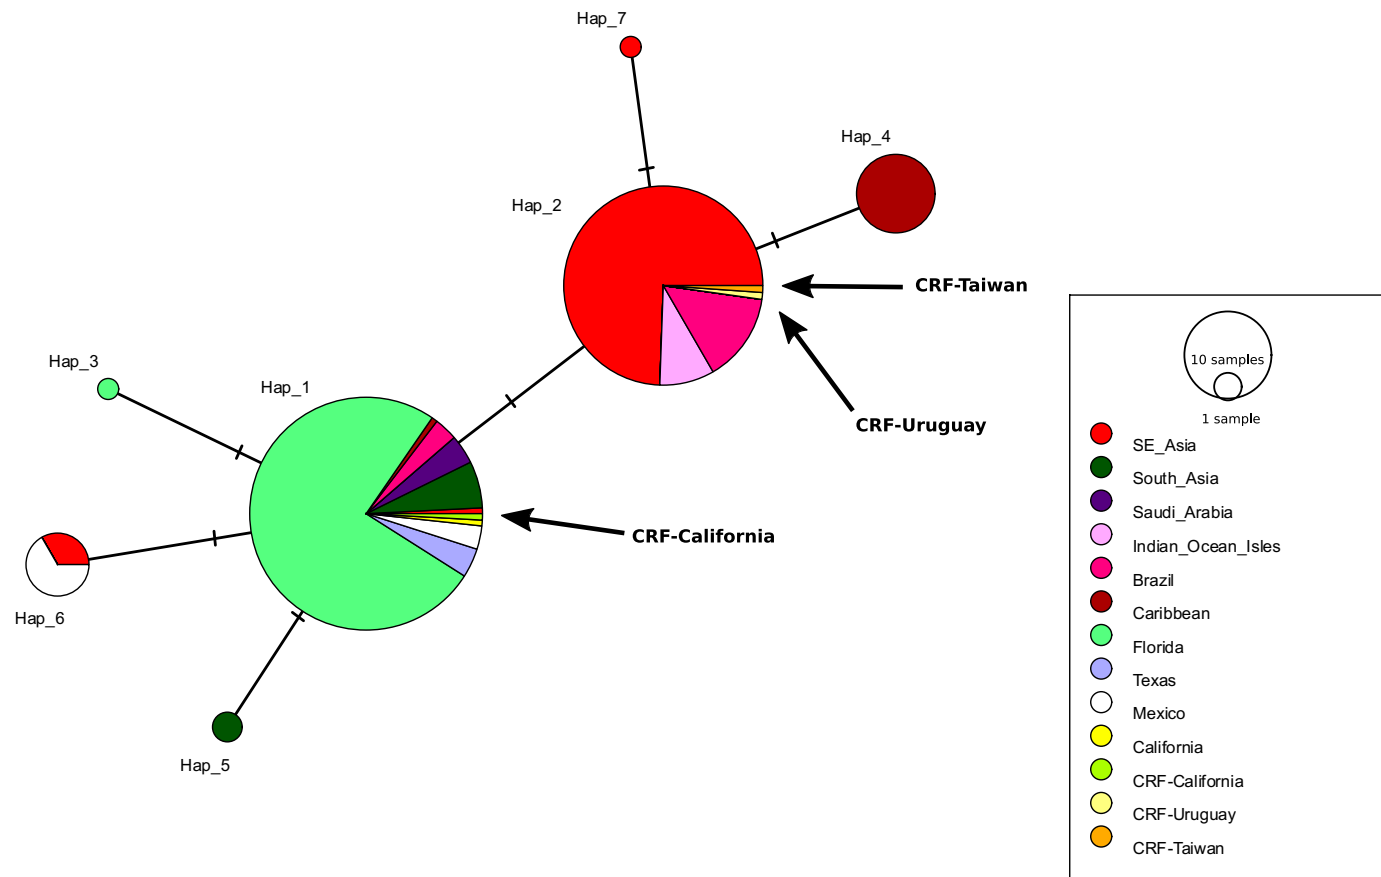

929

930 **Supplemental Figure 4.** Partial cytochrome *c* oxidase I (*COI*) TCS haplotype network coded by geographic region. Circle size  
 931 is scaled to the number of haplotypes. Hatch marks represent single nucleotide substitutions. CRF-CA is in haplotype 1. CRF-  
 932 TW and CRF-UY are in haplotype 2. Arrows added for emphasis. Haplotype 1 is most common (n = 123). Localities have been  
 933 collapsed into broad geographic regions. Region labelled “California” represents a mitogenome downloaded from NCBI.  
 934 Accession numbers available in Table S1. Specific locality and haplotype information available in Table S6.
